# Supplementary material for: Barriers and facilitators to implementation of shared medical appointments in primary care for the management of long-term conditions: a systematic review and synthesis of qualitative studies
Source: PubMed Central journal article supplement — BMJ Open. 2021 Aug 23;11(8):e046842. doi: 10.1136/bmjopen-2020-046842 (PMC8386233; doi:10.1136/bmjopen-2020-046842), 2021-08-23
Supplement: bmjopen-2020-046842supp001.pdf [file bmjopen-2020-046842supp001.pdf]

**Supplementary File 1- Example search strategy**

Medline Search (OVID MEDLINE(R) 1946 to June Week 4 2019)

Shared medical appointment\$

OR shared medical visit\$

OR cluster visit\$

OR group visit\$

OR group clinic\$

OR group appointment\$

OR group care\$

OR group meeting\$

OR group medical visit\$

OR group medical appointment\$

OR group medical clinic\$

OR group consultation\$

OR group medical care\$

OR group medical meeting\$

OR gmv

OR gma

OR co-operative health care clinic\$

AND (((("semi-structured" OR "semistructured" OR "unstructured" OR "informal" OR "in-depth"  
OR "indepth" OR "face-to-face" OR "structured" OR "guide") adj3 (interview\$ OR discussion\$ OR  
questionnaire\$)) OR (focus group\$ OR qualitative OR ethnograph\$ OR fieldwork OR "field work"  
OR "key informant")).ti,ab.
