# Supplementary material for: Barriers and facilitators to implementation of shared medical appointments in primary care for the management of long-term conditions: a systematic review and synthesis of qualitative studies
Source: PubMed Central journal article supplement — BMJ Open. 2021 Aug 23;11(8):e046842. doi: 10.1136/bmjopen-2020-046842 (PMC8386233; doi:10.1136/bmjopen-2020-046842), 2021-08-23
Supplement: bmjopen-2020-046842supp002.pdf [file bmjopen-2020-046842supp002.pdf]

## The ENTREQ Checklist

Enhancing transparency in reporting the synthesis of qualitative research

| Item                       | Guide and description                                                                                                                                                                                                                                                                                                                                                                                            | Reported on page                |
|----------------------------|------------------------------------------------------------------------------------------------------------------------------------------------------------------------------------------------------------------------------------------------------------------------------------------------------------------------------------------------------------------------------------------------------------------|---------------------------------|
| Aim                        | State the research question the synthesis addresses.                                                                                                                                                                                                                                                                                                                                                             | 5                               |
| Synthesis methodology      | Identify the synthesis methodology or theoretical framework which underpins the synthesis, and describe the rationale for choice of methodology (e.g. <i>meta-ethnography, thematic synthesis, critical interpretive synthesis, grounded theory synthesis, realist synthesis, meta-aggregation, meta-study, framework synthesis</i> ).                                                                           | 5 & 6                           |
| Approach to searching      | Indicate whether the search was pre-planned ( <i>comprehensive search strategies to seek all available studies</i> ) or iterative ( <i>to seek all available concepts until they theoretical saturation is achieved</i> ).                                                                                                                                                                                       | 5                               |
| Inclusion criteria         | Specify the inclusion/exclusion criteria (e.g. <i>in terms of population, language, year limits, type of publication, study type</i> ).                                                                                                                                                                                                                                                                          | 5                               |
| Data sources               | Describe the information sources used (e.g. <i>electronic databases (MEDLINE, EMBASE, CINAHL, psycINFO, Econlit), grey literature databases (digital thesis, policy reports), relevant organisational websites, experts, information specialists, generic web searches (Google Scholar) hand searching, reference lists</i> ) and when the searches conducted; provide the rationale for using the data sources. | 5                               |
| Electronic Search strategy | Describe the literature search (e.g. <i>provide electronic search strategies with population terms, clinical or health topic terms, experiential or social phenomena related terms, filters for qualitative research, and search limits</i> ).                                                                                                                                                                   | 5 and Supplementary file 1      |
| Study screening methods    | Describe the process of study screening and sifting (e.g. <i>title, abstract and full text review, number of independent reviewers who screened studies</i> ).                                                                                                                                                                                                                                                   | 6                               |
| Study characteristics      | Present the characteristics of the included studies (e.g. <i>year of publication, country, population, number of participants, data collection, methodology, analysis, research questions</i> ).                                                                                                                                                                                                                 | 97, Table 1- p8,<br>Table 2 p13 |
| Study selection results    | Identify the number of studies screened and provide reasons for study exclusion (e.g. <i>for comprehensive searching, provide numbers of studies screened and reasons for exclusion indicated in a figure/flowchart; for iterative searching describe reasons for study exclusion and inclusion based on modifications to the research question and/or contribution to theory development</i> ).                 | Figure 1, p7                    |

## The ENTREQ Checklist

Enhancing transparency in reporting the synthesis of qualitative research

|                         |                                                                                                                                                                                                                                                                                                       |                               |
|-------------------------|-------------------------------------------------------------------------------------------------------------------------------------------------------------------------------------------------------------------------------------------------------------------------------------------------------|-------------------------------|
| Rationale for appraisal | Describe the rationale and approach used to appraise the included studies or selected findings ( <i>e.g. assessment of conduct (validity and robustness), assessment of reporting (transparency), assessment of content and utility of the findings</i> ).                                            | P6                            |
| Appraisal items         | State the tools, frameworks and criteria used to appraise the studies or selected findings ( <i>e.g. Existing tools: CASP, QARI, COREQ, Mays and Pope [25]; reviewer developed tools; describe the domains assessed: research team, study design, data analysis and interpretations, reporting</i> ). | P6                            |
| Appraisal process       | Indicate whether the appraisal was conducted independently by more than one reviewer and if consensus was required.                                                                                                                                                                                   | P6                            |
| Appraisal results       | Present results of the quality assessment and indicate which articles, if any, were weighted/excluded based on the assessment and give the rationale.                                                                                                                                                 | P7<br>Supplementary File 2,   |
| Data extraction         | Indicate which sections of the primary studies were analysed and how were the data extracted from the primary studies? ( <i>e.g. all text under the headings "results /conclusions" were extracted electronically and entered into a computer software</i> ).                                         | P6                            |
| Software                | State the computer software used, if any.                                                                                                                                                                                                                                                             | P6                            |
| Number of reviewers     | Identify who was involved in coding and analysis.                                                                                                                                                                                                                                                     | P6                            |
| Coding                  | Describe the process for coding of data ( <i>e.g. line by line coding to search for concepts</i> ).                                                                                                                                                                                                   | P6                            |
| Study comparison        | Describe how were comparisons made within and across studies ( <i>e.g. subsequent studies were coded into pre-existing concepts, and new concepts were created when deemed necessary</i> ).                                                                                                           | P6                            |
| Derivation of themes    | Explain whether the process of deriving the themes or constructs was inductive or deductive.                                                                                                                                                                                                          | P6                            |
| Quotations              | Provide quotations from the primary studies to illustrate themes/constructs, and identify whether the quotations were participant quotations of the author's interpretation.                                                                                                                          | Table 3, -p16 and Table 4-p21 |
| Synthesis output        | Present rich, compelling and useful results that go beyond a summary of the primary studies ( <i>e.g. new interpretation, models of evidence, conceptual models, analytical framework, development of a new theory or construct</i> ).                                                                | P23-26                        |
