# Supplementary material for: Barriers and facilitators to implementation of shared medical appointments in primary care for the management of long-term conditions: a systematic review and synthesis of qualitative studies
Source: PubMed Central journal article supplement — BMJ Open. 2021 Aug 23;11(8):e046842. doi: 10.1136/bmjopen-2020-046842 (PMC8386233; doi:10.1136/bmjopen-2020-046842), 2021-08-23
Supplement: bmjopen-2020-046842supp003.pdf [file bmjopen-2020-046842supp003.pdf]

## Supplementary File 2 Quality appraisal of studies included in review

| First author & date                    | CASP criteria     |                         |                    |             |                 |             |                |               |                       |          | Overview of limitations and richness of data |                                                                                                                                                                                                                                                                                                                                                                                                                                                                                    |
|----------------------------------------|-------------------|-------------------------|--------------------|-------------|-----------------|-------------|----------------|---------------|-----------------------|----------|----------------------------------------------|------------------------------------------------------------------------------------------------------------------------------------------------------------------------------------------------------------------------------------------------------------------------------------------------------------------------------------------------------------------------------------------------------------------------------------------------------------------------------------|
|                                        | Statement of aims | Appropriate methodology | Appropriate design | Recruitment | Data collection | Reflexivity | Ethical issues | Data analysis | Statement of findings | Valuable |                                              |                                                                                                                                                                                                                                                                                                                                                                                                                                                                                    |
| Arney <i>et al.</i> 2018[23]           | Yes               | Yes                     | Yes                | Yes         | Yes             | Yes         | Yes            | Yes           | Yes                   | Yes      | Very                                         | <ul style="list-style-type: none"> <li>• Reasons for declining invitation to participate were not reported. Potential researcher bias not discussed.</li> <li>• Many quotations (with participant occupation) provided to support themes.</li> </ul>                                                                                                                                                                                                                               |
| Bauer <i>et al.</i> 2017[16]           | Yes               | Yes                     | Yes                | Can't tell  | Yes             | Can't tell  | Can't tell     | Yes           | Yes                   | Yes      | Moderately                                   | <ul style="list-style-type: none"> <li>• Recruitment strategy not reported. Unclear whether anyone declined to participate. Unclear how research was explained to participants. Potential researcher bias not discussed.</li> <li>• Many quotations (without participant characteristics) provided that support findings.</li> </ul>                                                                                                                                               |
| Cornelio-Flores <i>et al.</i> 2018[17] | Yes               | Yes                     | Yes                | Can't tell  | Yes             | Yes         | Yes            | Yes           | Yes                   | Yes      | Very                                         | <ul style="list-style-type: none"> <li>• Unclear how participants were invited to participate in focus groups and whether any declined. Focus groups held during last GMV session by facilitator external to the research team.</li> <li>• Many quotes included without participant characteristics. Data relatively rich.</li> </ul>                                                                                                                                              |
| Drake <i>et al.</i> 2018[18]           | Yes               | Yes                     | Yes                | Can't tell  | Yes             | No          | Yes            | Yes           | Yes                   | Yes      | Very                                         | <ul style="list-style-type: none"> <li>• Unclear how participants were invited to participate in focus groups and whether any declined. Unclear who facilitated the focus groups and what role/relationship they had with study participants, no discussion of author biases.</li> <li>• Some quotes (without participant characteristics) included though not very rich. Very few patient accounts reported.</li> </ul>                                                           |
| Egger <i>et al.</i> 2015[19]           | Yes               | Yes                     | Yes                | Can't tell  | Yes             | No          | Yes            | Can't tell    | Yes                   | Yes      | Moderately                                   | <ul style="list-style-type: none"> <li>• Recruitment strategy not reported. Research team involved in delivering SMAs, no discussion of potential researcher bias. Acknowledged potential bias in self-selection of participants.</li> <li>• Fairly thin qualitative data about satisfaction/enjoyment. Quotations provided without participant characteristics.</li> </ul>                                                                                                        |
| Housden <i>et al.</i> 2016[25]         | Yes               | Yes                     | Yes                | Yes         | Yes             | Can't tell  | Yes            | Yes           | Yes                   | Yes      | Very                                         | <ul style="list-style-type: none"> <li>• No reflection on potential bias in data collection or analysis by authors.</li> <li>• Good illustrative quotes. In-depth accounts provided.</li> </ul>                                                                                                                                                                                                                                                                                    |
| Housden <i>et al.</i> 2017[29]         | Yes               | Yes                     | Yes                | Yes         | Yes             | Can't tell  | Yes            | Yes           | Yes                   | Yes      | Very                                         | <ul style="list-style-type: none"> <li>• No reflection on potential bias in data collection or analysis by authors.</li> <li>• In-depth analysis. Rich illustrative quotes both HCP and patients.</li> </ul>                                                                                                                                                                                                                                                                       |
| Kowalski <i>et al.</i> 2018[28]        | Yes               | Yes                     | Yes                | Yes         | Yes             | Can't tell  | Yes            | Yes           | Yes                   | Yes      | Very                                         | <ul style="list-style-type: none"> <li>• Relationship between authors and study participants unclear. Authors appear to be involved data collection, analysis and subsequent SMA implementation. This source of potential bias not discussed.</li> <li>• Rich quotes included in narrative with participant occupation reported. Lots of thin quotes covering lots of aspects mapped onto CFIR framework. Difficult to untangle SMAs from SMA-with peer 2 peer support.</li> </ul> |
| *Lavoie <i>et al.</i> 2013[30]         | Yes               | Yes                     | Yes                | Can't tell  | Yes             | Can't tell  | Yes            | Yes           | Yes                   | Yes      | Very                                         | <ul style="list-style-type: none"> <li>• Unclear how providers were identified, how many were invited and how many declined or for what reason. Potential researcher bias not discussed</li> <li>• Rich data with illustrative quotes presented without reporting patient practitioner characteristics.</li> </ul>                                                                                                                                                                 |

|                                 |     |     |     |            |     |            |            |            |     |            |                                                                                                                                                                                                                                                                                                                                                                                                                           |
|---------------------------------|-----|-----|-----|------------|-----|------------|------------|------------|-----|------------|---------------------------------------------------------------------------------------------------------------------------------------------------------------------------------------------------------------------------------------------------------------------------------------------------------------------------------------------------------------------------------------------------------------------------|
| Miller <i>et al.</i> 2004[33]   | Yes | Yes | Yes | Can't tell | Yes | Can't tell | Yes        | Yes        | Yes | Moderately | <ul style="list-style-type: none"> <li>Unclear if any participants declined to participate in an interview or why. Potential researcher bias not discussed.</li> <li>Qualitative data very thin, no quotations provided.</li> </ul>                                                                                                                                                                                       |
| Siple <i>et al.</i> 2015[20]    | Yes | Yes | Yes | Can't tell | Yes | No         | Can't tell | Yes        | Yes | Very       | <ul style="list-style-type: none"> <li>Participant recruitment not described. Reasons for declining invitation not reported. Focused on views of diabetes self-management (which so happened to be via SMA) so less of SMA experience.</li> <li>Quotes are available but themes linked with factors influencing their self-care/motivation and less about SMA experience. Views of wives/carers not presented.</li> </ul> |
| Stevens <i>et al.</i> 2014[21]  | Yes | Yes | Yes | Can't tell | Yes | Can't Tell | Yes        | Yes        | Yes | Very       | <ul style="list-style-type: none"> <li>Recruitment strategy not reported. Not clear if any participants declined to participate in an interview. Potential researcher bias not discussed.</li> <li>Quotes from HCP and patents included with participant characteristics. Qualitative data thin.</li> </ul>                                                                                                               |
| Stowell <i>et al.</i> 2015[22]  | Yes | Yes | Yes | Can't tell | Yes | Can't tell | Can't tell | Can't tell | Yes | Low        | <ul style="list-style-type: none"> <li>Recruitment procedure not reported. No reflection on researcher bias. Unclear if ethical approval or informed consent required and/or obtained. No description of qualitative data analysis given.</li> <li>No qualitative data reported - no quotations. Interview findings combined with survey findings and authors narrative does not contain quotes.</li> </ul>               |
| Stults <i>et al.</i> 2016[32]   | Yes | Yes | Yes | Yes        | Yes | No         | Yes        | Yes        | Yes | Very       | <ul style="list-style-type: none"> <li>Reasons for declining study invitation not reported. Potential researcher bias not discussed.</li> <li>Provides rich data. Quotes together with participant characteristics reported-age, gender SMA attended, Only data from patients attending SMAs for chronic condition extracted.</li> </ul>                                                                                  |
| Thompson <i>et al.</i> 2014[24] | Yes | Yes | Yes | Yes        | Yes | Can't tell | Yes        | Yes        | Yes | Very       | <ul style="list-style-type: none"> <li>Unclear how participants were selected and contacted. Whether any declined to take part.</li> <li>Some quotes (without participant characteristics) provided in a table with themes and key findings, thin data.</li> </ul>                                                                                                                                                        |
| Thompson-Lastad (2018)[31]      | Yes | Yes | Yes | Yes        | Yes | No         | Yes        | Yes        | Yes | Very       | <ul style="list-style-type: none"> <li>Reflection on potential researcher bias and influence on group dynamics not discussed.</li> <li>Limitation: some SMAs were run for non-long-term conditions therefore coding of only experiences/data that refers to long-term condition SMAs. Lots of rich qualitative data (quotes).</li> </ul>                                                                                  |
| Tokuda <i>et al.</i> 2016[26]   | Yes | Yes | Yes | Yes        | Yes | No         | Yes        | Can't tell | Yes | Very       | <ul style="list-style-type: none"> <li>Qualitative data analysis process not reported. Potential researcher bias not discussed.</li> <li>Quotations (without patient characteristics) included to support findings, rich data.</li> </ul>                                                                                                                                                                                 |
| *Wong <i>et al.</i> 2015[27]    | Yes | Yes | Yes | Yes        | Yes | No         | Yes        | Yes        | Yes | Very       | <ul style="list-style-type: none"> <li>Relationship between researcher and participants unclear. Potential researcher bias not discussed.</li> <li>Rich data. Quotes (without participant characteristics) provided to support key findings.</li> </ul>                                                                                                                                                                   |

HCP= healthcare practitioner
